# Supplementary material
Source: PubMed Central journal article supplement (PMC2084275)

DTR Trends ( $^{\circ}\text{C}/10\text{yrs}$ )

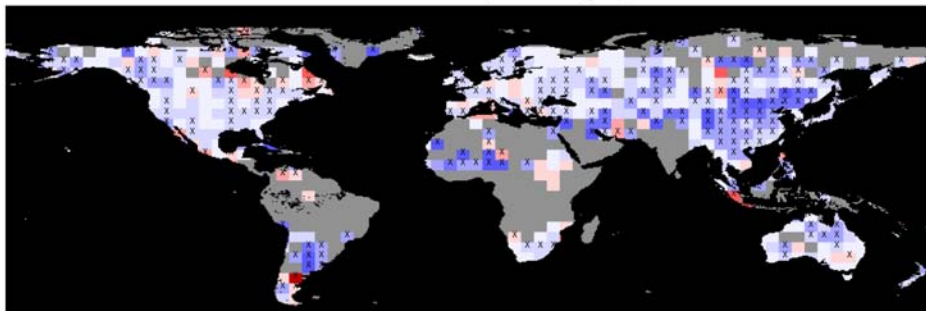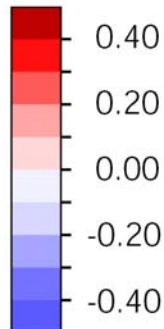

PDSI Trends ( $/10\text{yrs}$ )

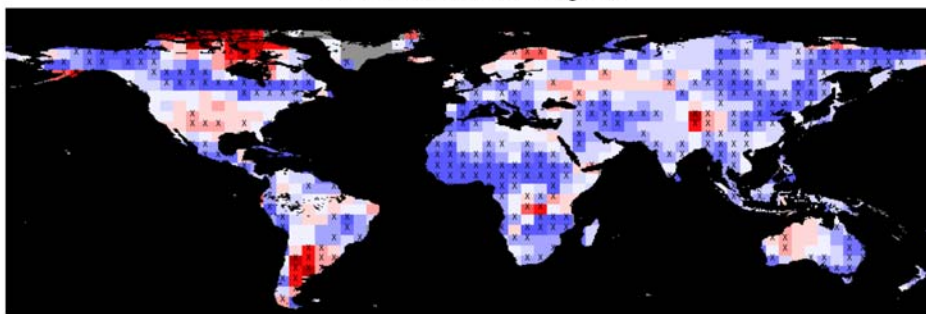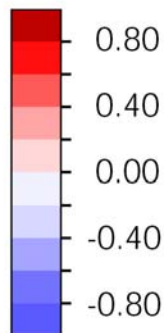

Precipitation Trends ( $\text{mm}/\text{day}/10\text{yrs}$ )

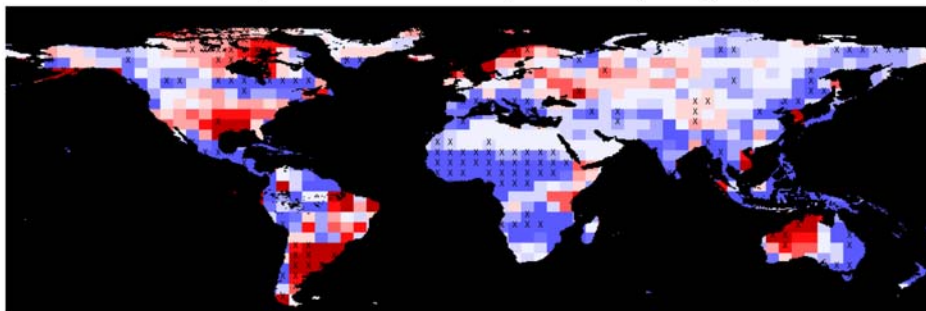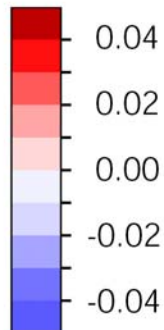

Supplement: pnas_0700290104_1.pdf [file pnas_0700290104_1.pdf]
