# Supplementary material
Source: PubMed Central journal article supplement (PMC2084275)

# Latent Heat Flux

Nighttime Difference (NVLE - CTL)

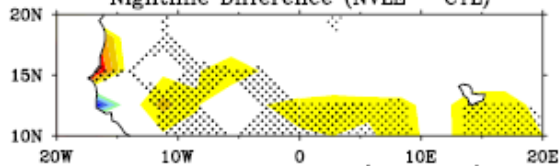

Daytime Difference (NVLE - CTL)

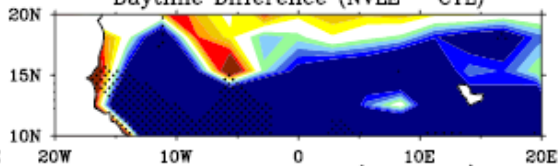

Nighttime Difference (NV - CTL)

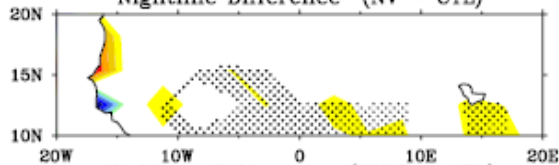

Daytime Difference (NV - CTL)

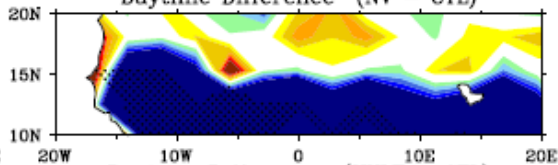

Nighttime Difference (HVLE - CTL)

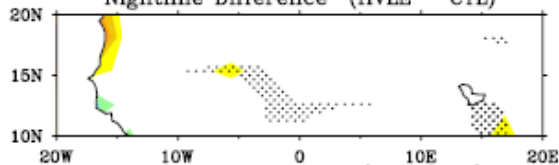

Daytime Difference (HVLE - CTL)

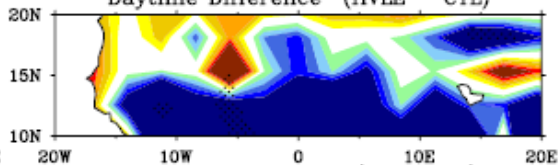

Nighttime Difference (HV - CTL)

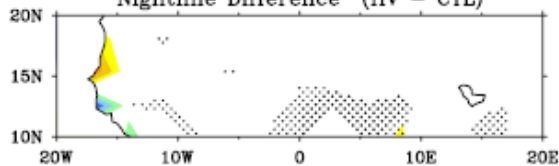

Daytime Difference (HV - CTL)

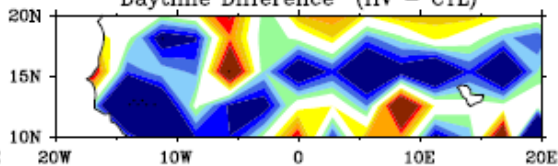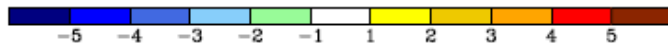

Supplement: pnas_0700290104_10.pdf [file pnas_0700290104_10.pdf]
