# Supplementary material
Source: PubMed Central journal article supplement (PMC2084275)

# Sensible Heat Flux

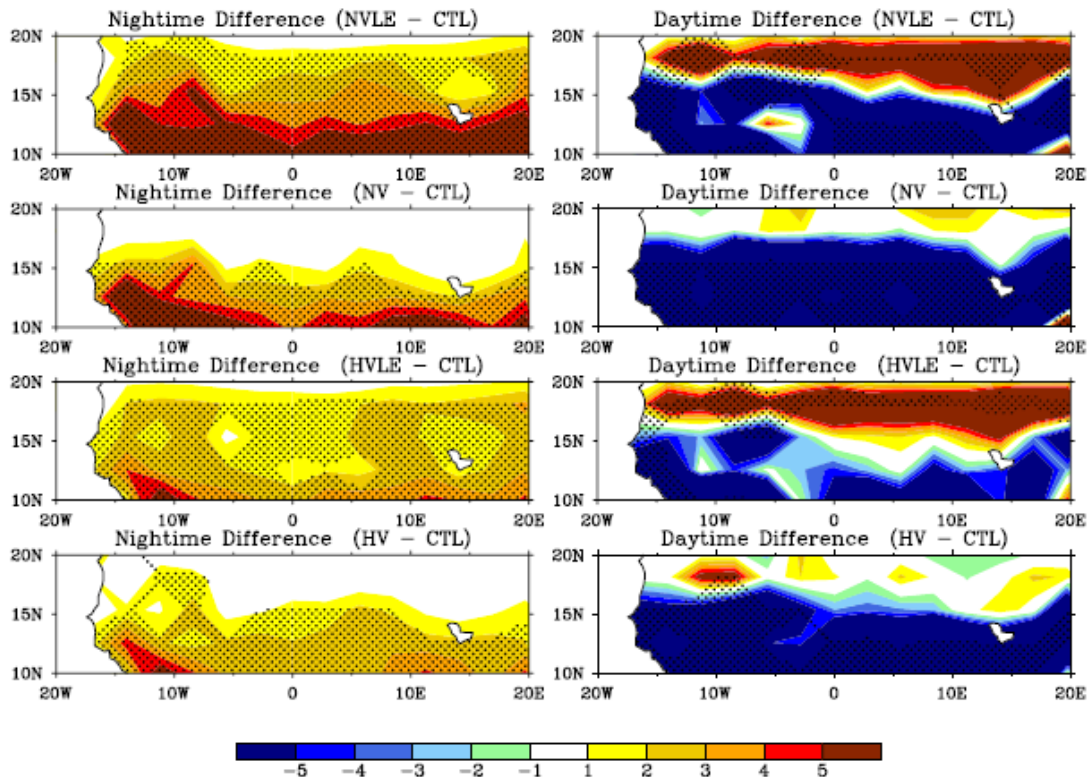

Supplement: pnas_0700290104_11.pdf [file pnas_0700290104_11.pdf]

# Soil Flux

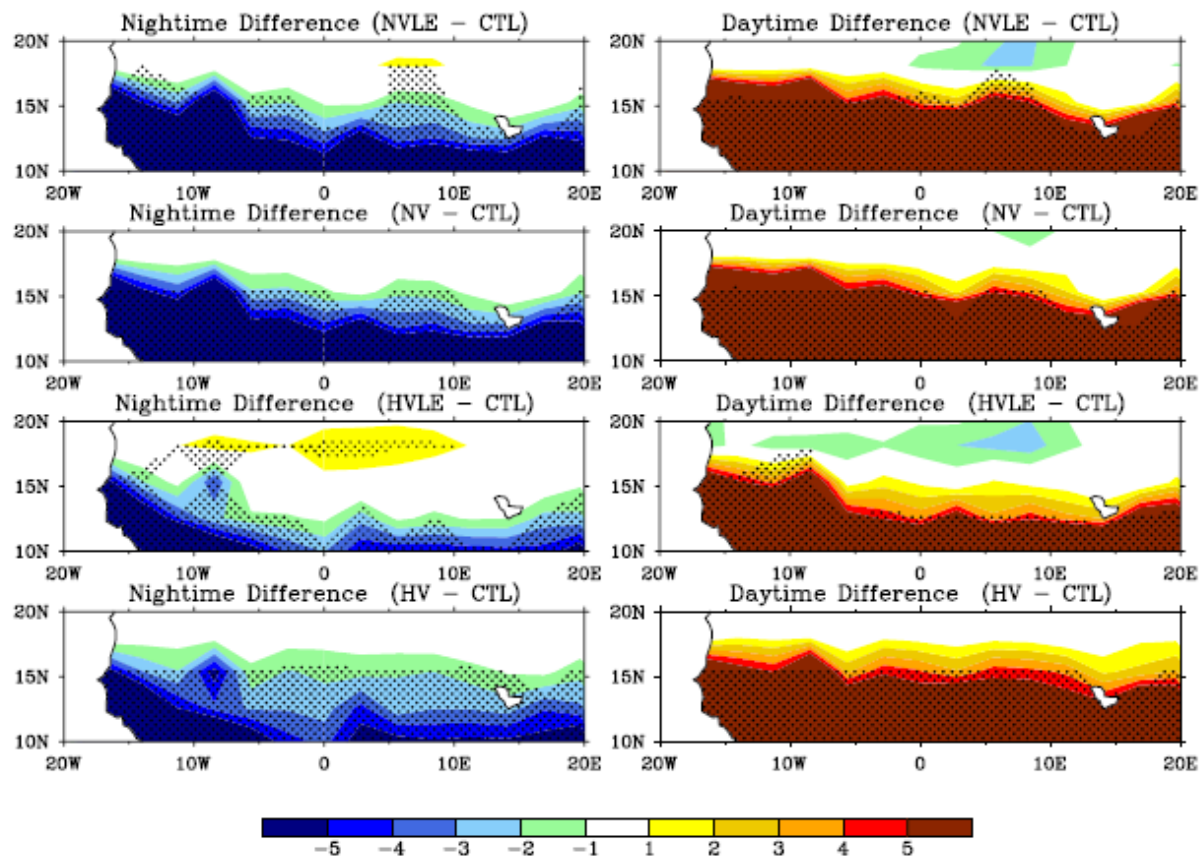

Supplement: pnas_0700290104_12.pdf [file pnas_0700290104_12.pdf]

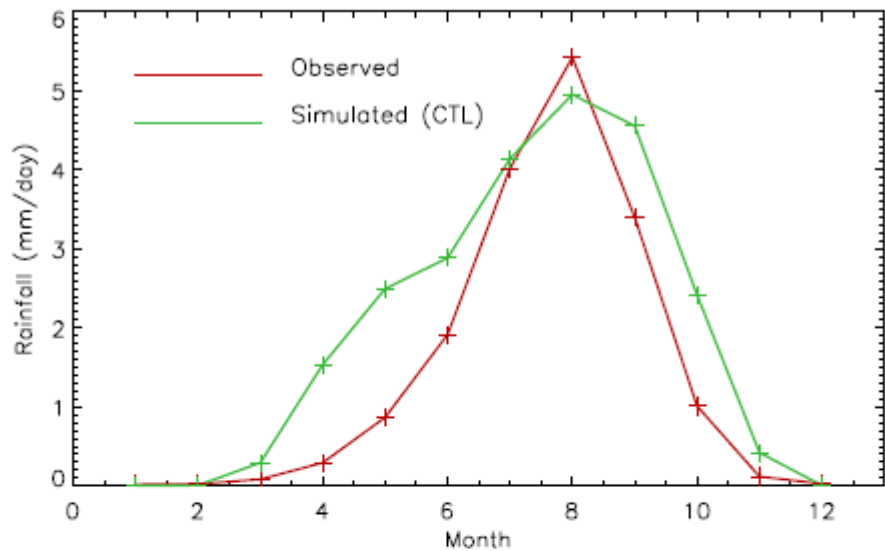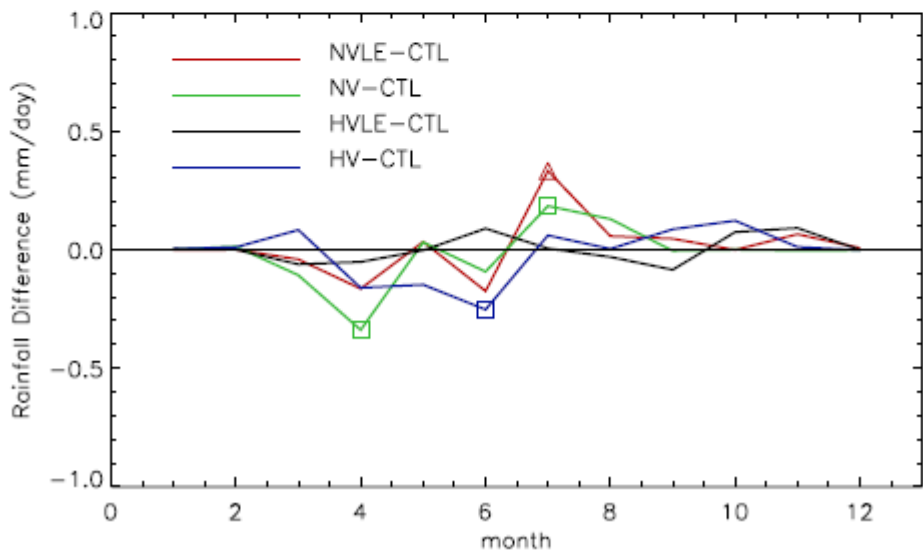

Supplement: pnas_0700290104_14.pdf [file pnas_0700290104_14.pdf]

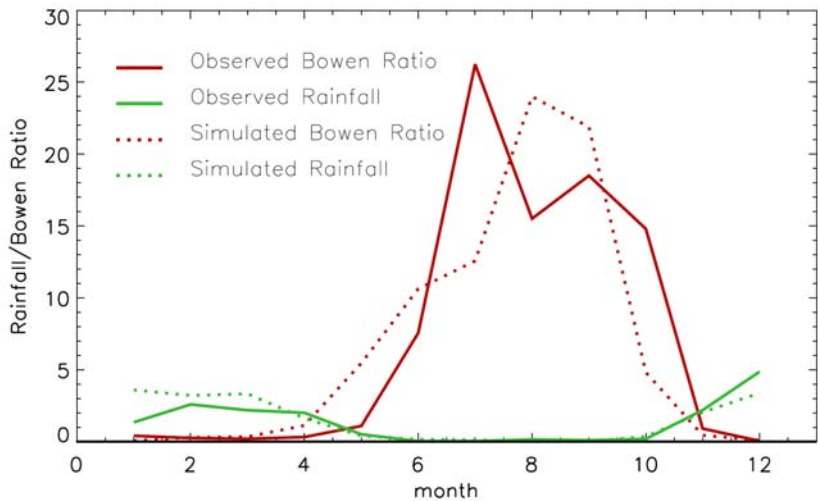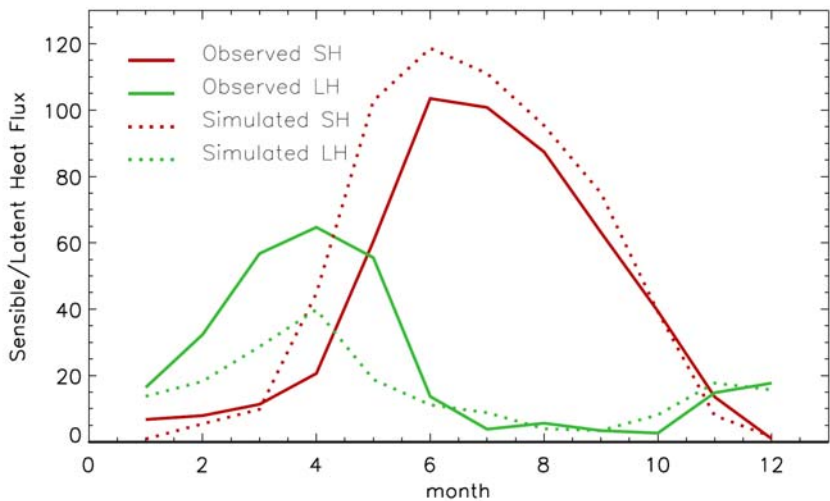

Supplement: pnas_0700290104_15.pdf [file pnas_0700290104_15.pdf]

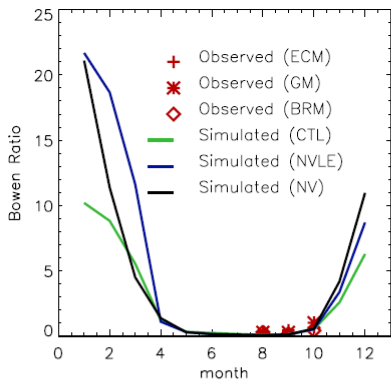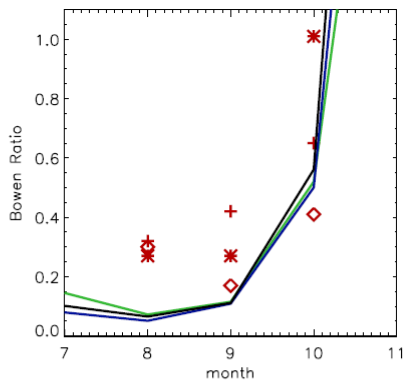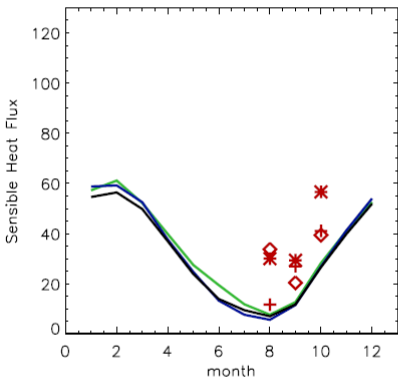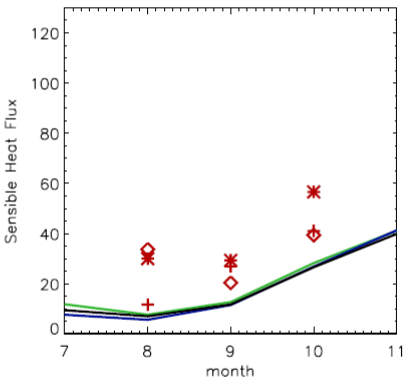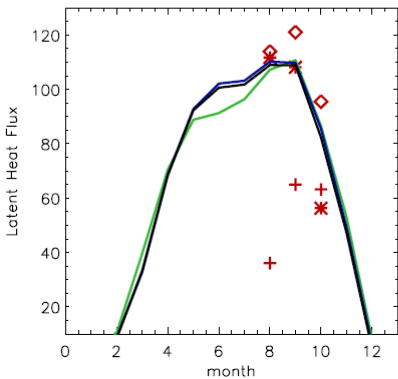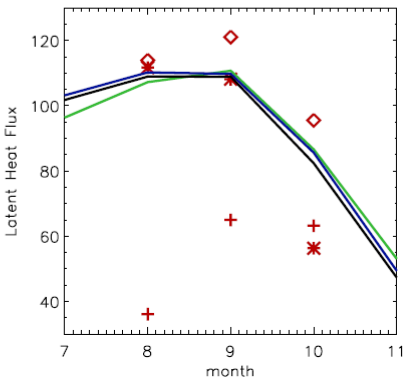

Supplement: pnas_0700290104_16.pdf [file pnas_0700290104_16.pdf]

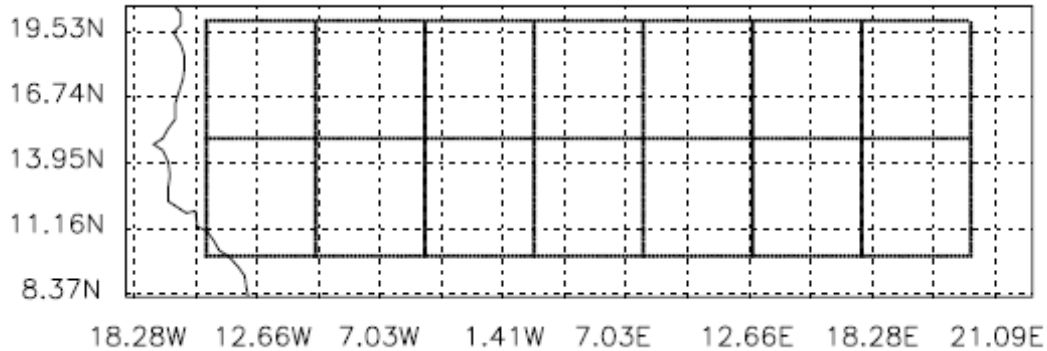

Supplement: pnas_0700290104_2.pdf [file pnas_0700290104_2.pdf]

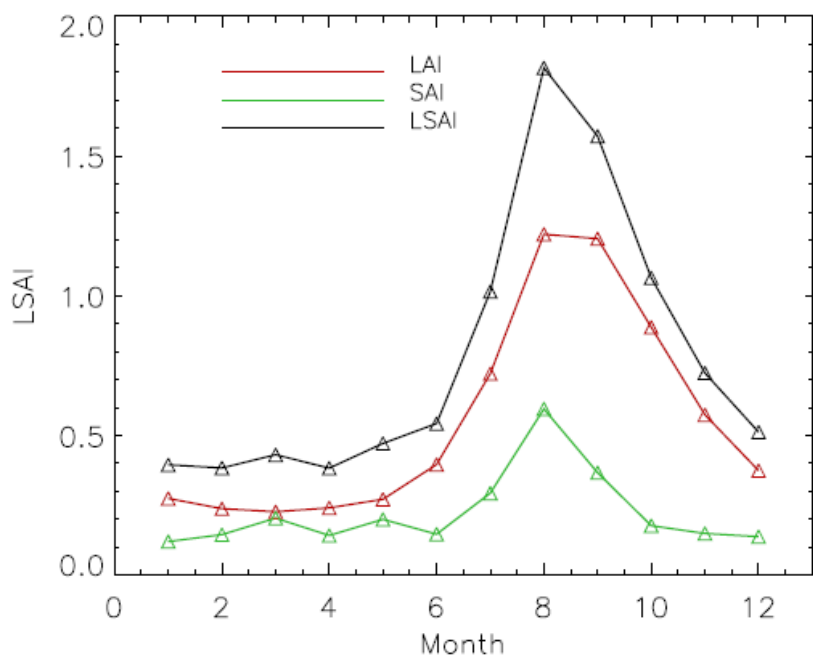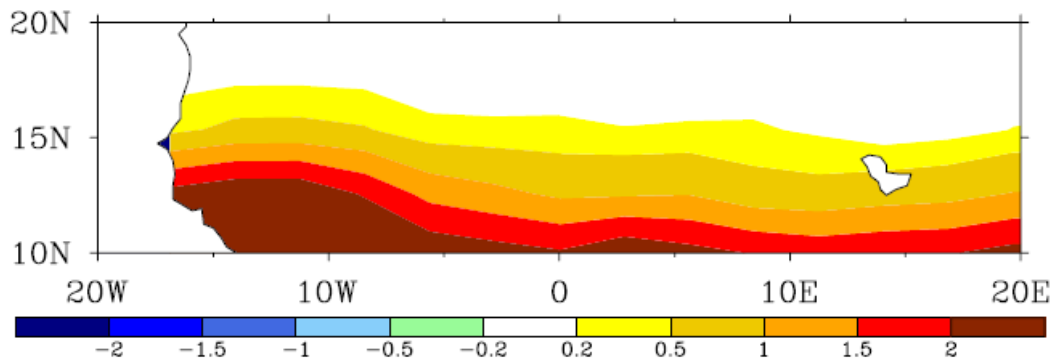

Supplement: pnas_0700290104_3.pdf [file pnas_0700290104_3.pdf]

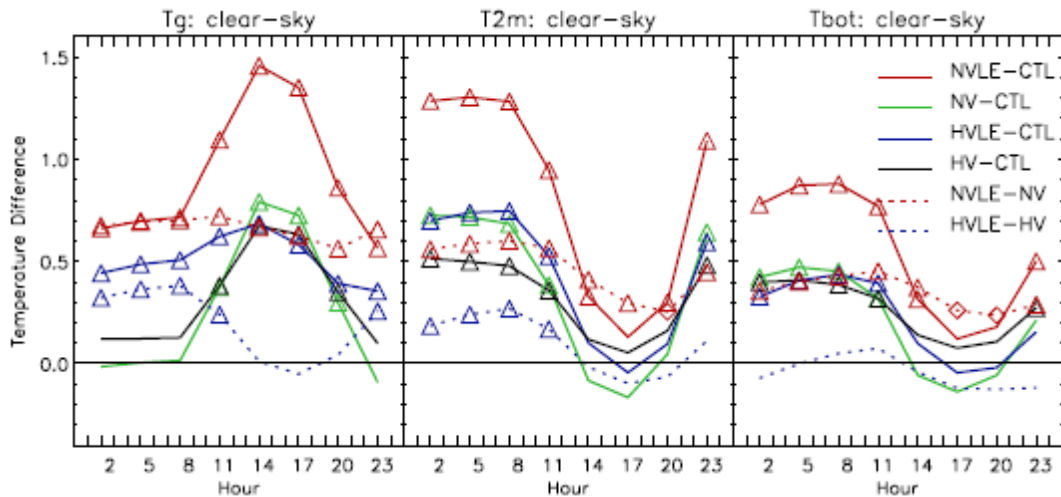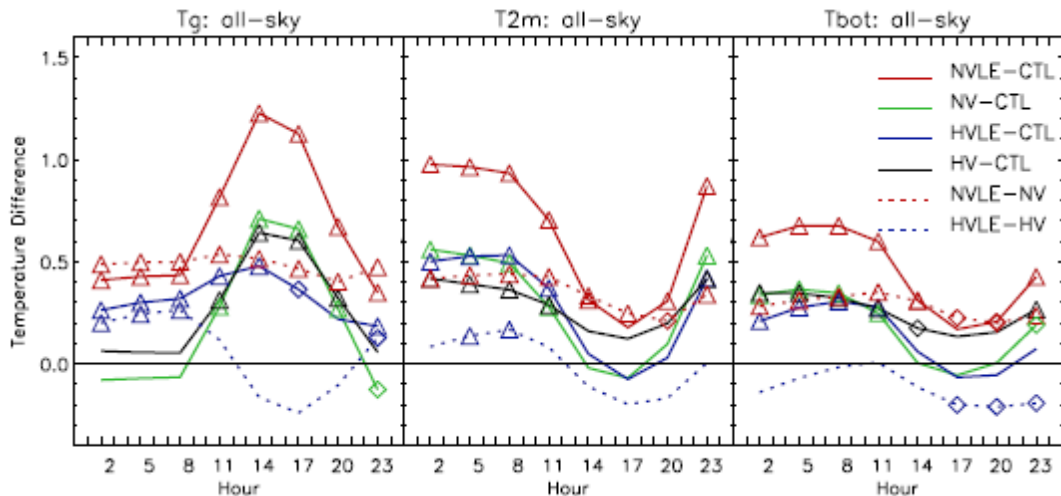

Supplement: pnas_0700290104_4.pdf [file pnas_0700290104_4.pdf]

# Ground Temperature

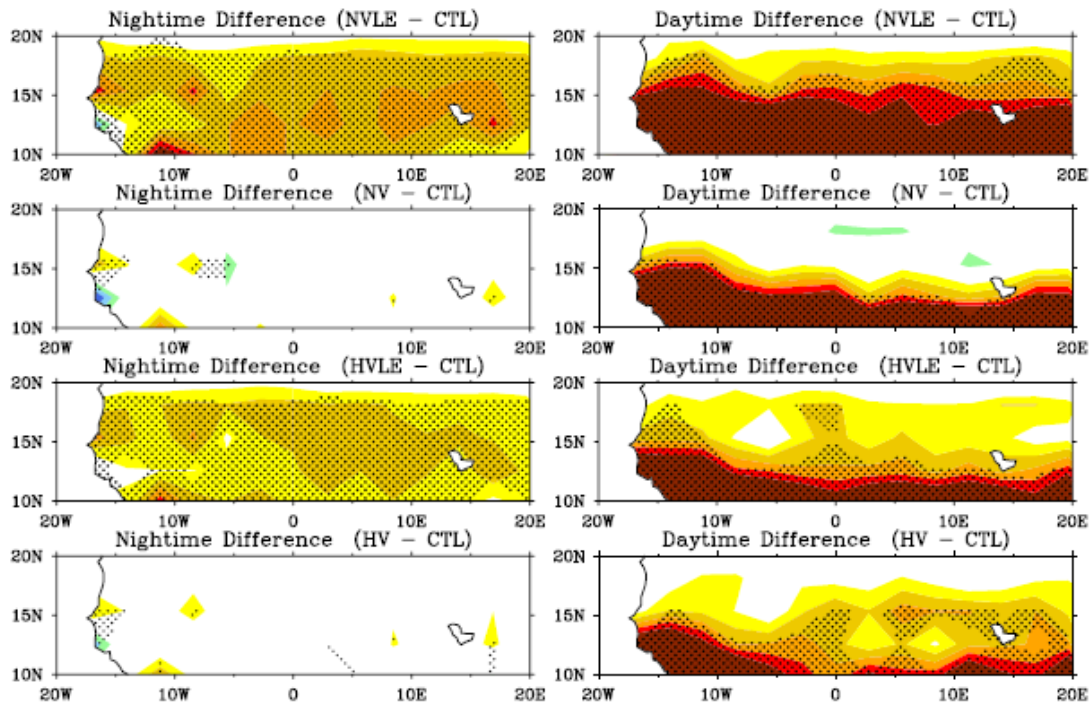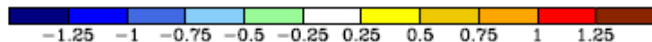

Supplement: pnas_0700290104_5.pdf [file pnas_0700290104_5.pdf]

# Lowest Atmospheric Level Temperature

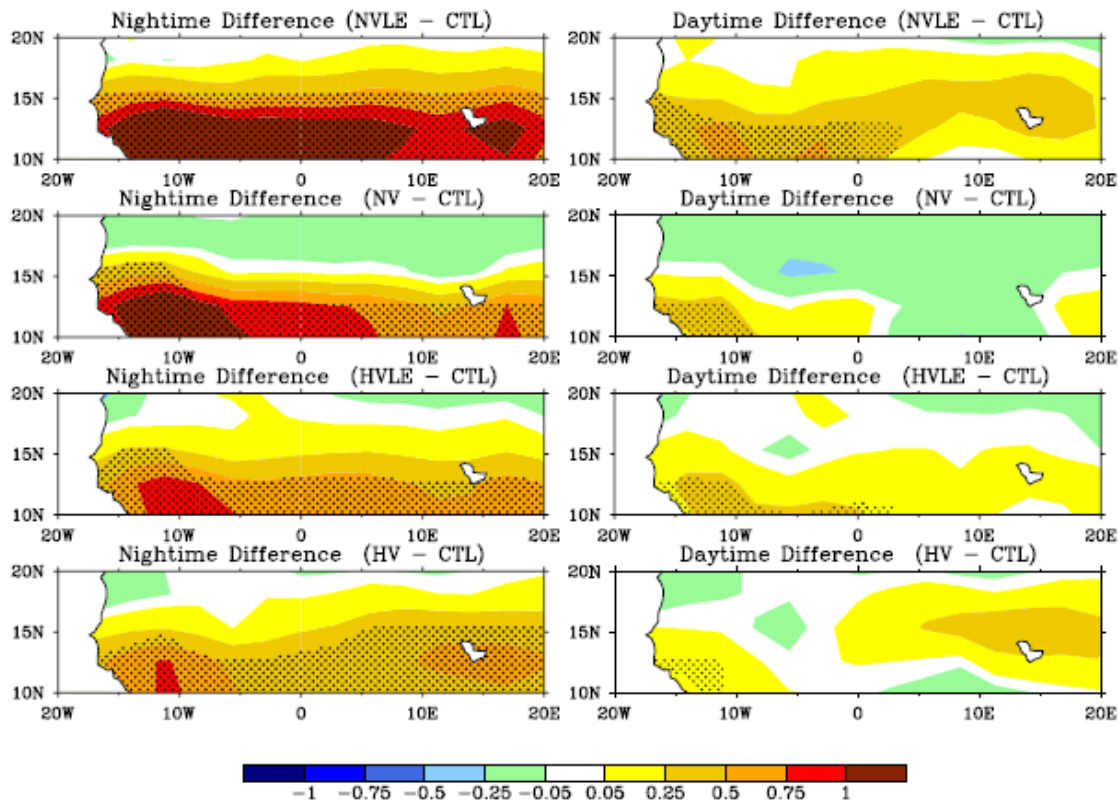

Supplement: pnas_0700290104_6.pdf [file pnas_0700290104_6.pdf]

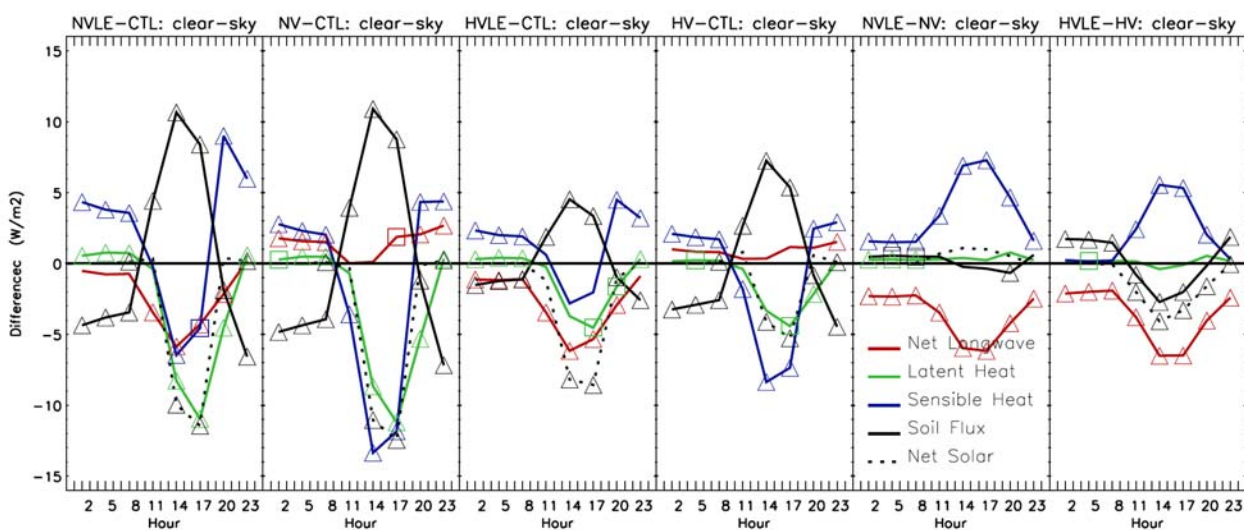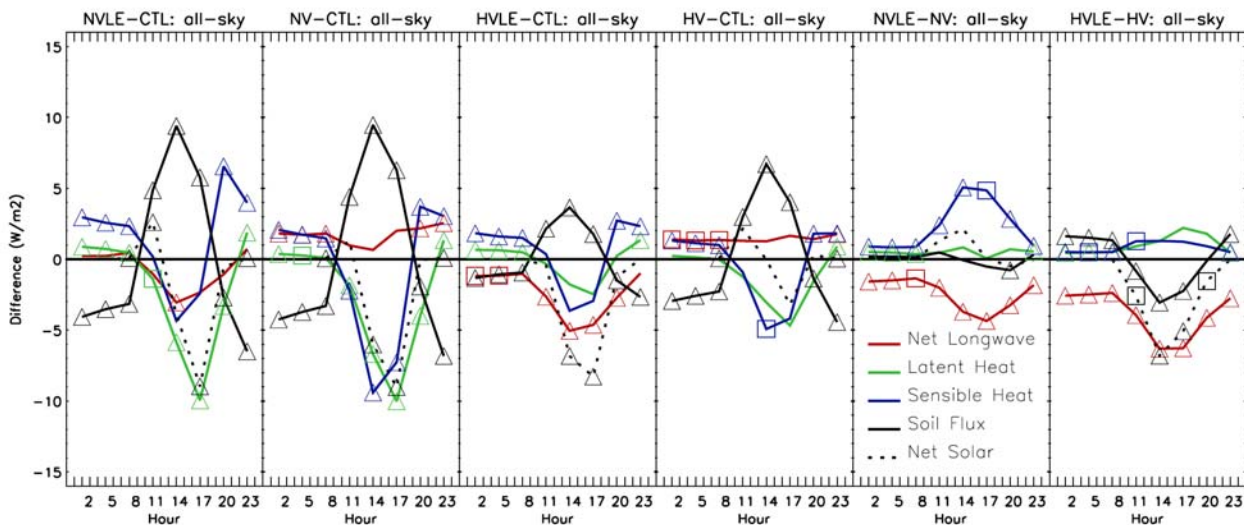

Supplement: pnas_0700290104_7.pdf [file pnas_0700290104_7.pdf]

# Net Longwave Radiation

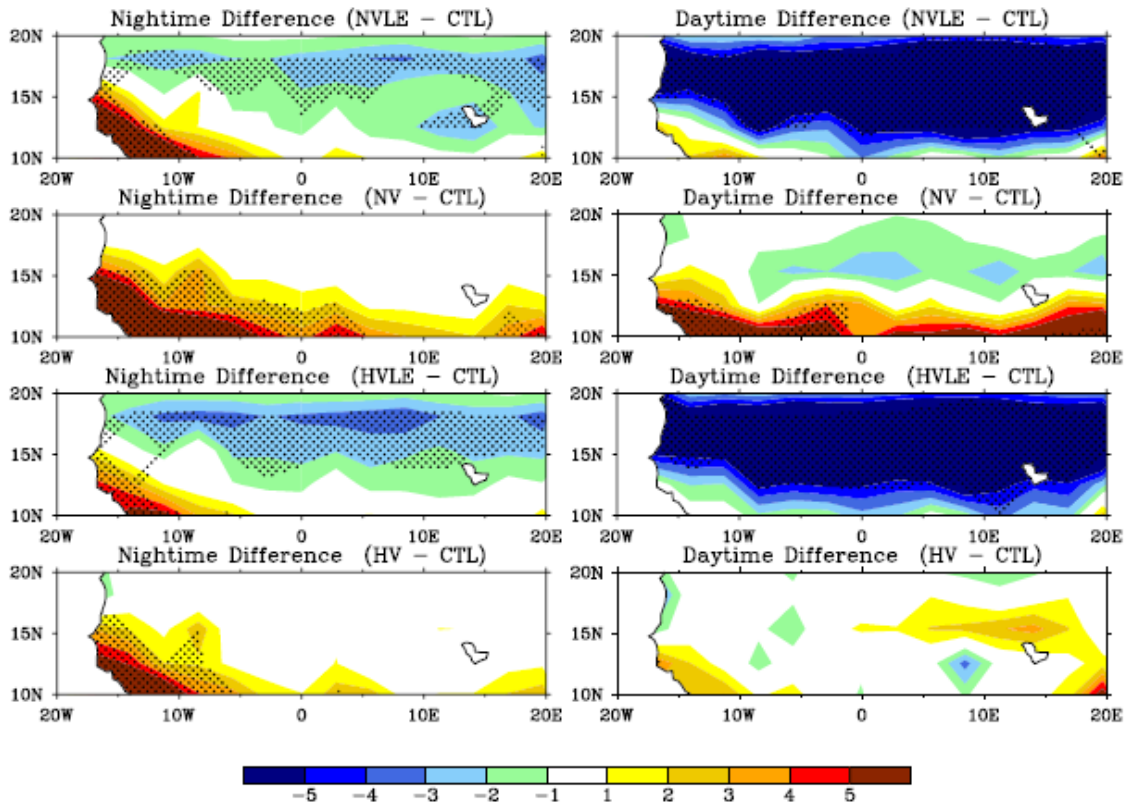

Supplement: pnas_0700290104_8.pdf [file pnas_0700290104_8.pdf]

# Upward Longwave Radiation

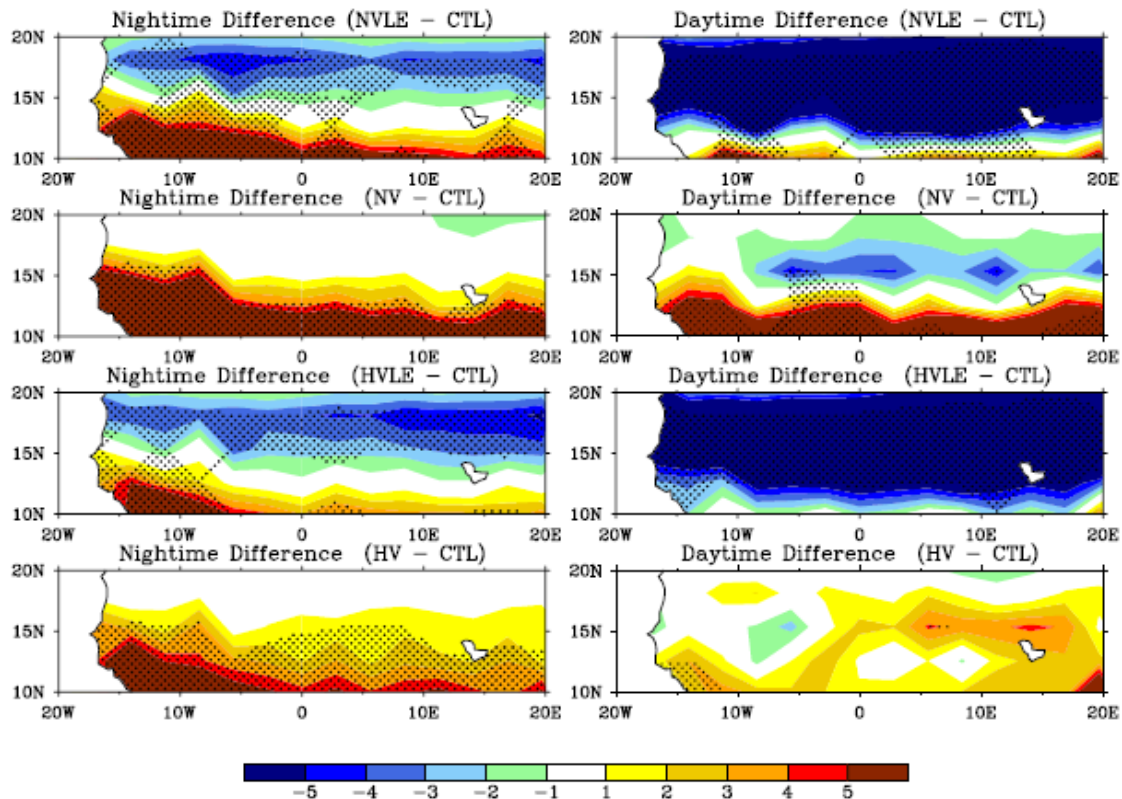

Supplement: pnas_0700290104_9.pdf [file pnas_0700290104_9.pdf]
